# Supplementary material
Source: publisher figshare collection journal article supplement (https://acs.figshare.com/ndownloader/files/4238239)
Supplement: Supplementary file 1 [file 4238239]

 
data_compound-2
 
_audit_creation_method            SHELXL-97
_chemical_name_systematic
;
 8-hydroxy-4,7-dimethyl-2H-chromen-2-one
;
_chemical_name_common             ?
_chemical_melting_point           ?
_chemical_formula_moiety          ?
_chemical_formula_sum
 'C11 H10 O3'
_chemical_formula_weight          190.19
 
loop_
 _atom_type_symbol
 _atom_type_description
 _atom_type_scat_dispersion_real
 _atom_type_scat_dispersion_imag
 _atom_type_scat_source
 'C'  'C'   0.0033   0.0016
 'International Tables Vol C Tables 4.2.6.8 and 6.1.1.4'
 'H'  'H'   0.0000   0.0000
 'International Tables Vol C Tables 4.2.6.8 and 6.1.1.4'
 'O'  'O'   0.0106   0.0060
 'International Tables Vol C Tables 4.2.6.8 and 6.1.1.4'
 
_symmetry_cell_setting            monoclinic
_symmetry_space_group_name_H-M    P21/c
 
loop_
 _symmetry_equiv_pos_as_xyz
 'x, y, z'
 '-x, y+1/2, -z+1/2'
 '-x, -y, -z'
 'x, -y-1/2, z-1/2'
 
_cell_length_a                    7.0380(11)
_cell_length_b                    9.396(3)
_cell_length_c                    13.3580(11)
_cell_angle_alpha                 90.00
_cell_angle_beta                  98.932(6)
_cell_angle_gamma                 90.00
_cell_volume                      872.6(3)
_cell_formula_units_Z             4
_cell_measurement_temperature     150(2)
_cell_measurement_reflns_used     500
_cell_measurement_theta_min       1.5
_cell_measurement_theta_max       25.0
 
_exptl_crystal_description        ?
_exptl_crystal_colour             ?
_exptl_crystal_size_max           0.19
_exptl_crystal_size_mid           0.12
_exptl_crystal_size_min           0.07
_exptl_crystal_density_meas       ?
_exptl_crystal_density_diffrn     1.448
_exptl_crystal_density_method     'not measured'
_exptl_crystal_F_000              400
_exptl_absorpt_coefficient_mu     0.106
_exptl_absorpt_correction_type    none
_exptl_absorpt_correction_T_min   ?
_exptl_absorpt_correction_T_max   ?
_exptl_absorpt_process_details    ?
 
_exptl_special_details
;
 ?
;
 
_diffrn_ambient_temperature       150(2)
_diffrn_radiation_wavelength      0.71073
_diffrn_radiation_type            MoK\a
_diffrn_radiation_source          'fine-focus sealed tube'
_diffrn_radiation_monochromator   graphite
_diffrn_measurement_device_type   'BRUKER SMART APEX II CCD AREA DETECTOR'
_diffrn_measurement_method        'OMEGA SCAN'
_diffrn_detector_area_resol_mean  ?
_diffrn_standards_number          ?
_diffrn_standards_interval_count  ?
_diffrn_standards_interval_time   ?
_diffrn_standards_decay_%         ?
_diffrn_reflns_number             7715
_diffrn_reflns_av_R_equivalents   0.0273
_diffrn_reflns_av_sigmaI/netI     0.0185
_diffrn_reflns_limit_h_min        -8
_diffrn_reflns_limit_h_max        8
_diffrn_reflns_limit_k_min        -11
_diffrn_reflns_limit_k_max        11
_diffrn_reflns_limit_l_min        -15
_diffrn_reflns_limit_l_max        15
_diffrn_reflns_theta_min          2.66
_diffrn_reflns_theta_max          25.00
_reflns_number_total              1536
_reflns_number_gt                 1469
_reflns_threshold_expression      >2sigma(I)
 
_computing_data_collection        'BRUKER SMART APEX II'
_computing_cell_refinement        'BRUKER SMART APEX II'
_computing_data_reduction         'BRUKER AXS SAINT'
_computing_structure_solution     'SHELXS-97 (Sheldrick, 1990)'
_computing_structure_refinement   'SHELXL-97 (Sheldrick, 1997)'
_computing_molecular_graphics     
'ORTEP-3 for Windows (Version 1.06) and CAMERON'
_computing_publication_material   'SHELXL97 and PARST 95 (Nardelli, 1995)'
 
_refine_special_details
;
 Refinement of F^2^ against ALL reflections.  The weighted R-factor wR and
 goodness of fit S are based on F^2^, conventional R-factors R are based
 on F, with F set to zero for negative F^2^. The threshold expression of
 F^2^ > 2sigma(F^2^) is used only for calculating R-factors(gt) etc. and is
 not relevant to the choice of reflections for refinement.  R-factors based
 on F^2^ are statistically about twice as large as those based on F, and R-
 factors based on ALL data will be even larger.
;
 
_refine_ls_structure_factor_coef  Fsqd
_refine_ls_matrix_type            full
_refine_ls_weighting_scheme       calc
_refine_ls_weighting_details
 'calc w=1/[\s^2^(Fo^2^)+(0.0552P)^2^+0.2771P] where P=(Fo^2^+2Fc^2^)/3'
_atom_sites_solution_primary      direct
_atom_sites_solution_secondary    difmap
_atom_sites_solution_hydrogens    geom
_refine_ls_hydrogen_treatment     constr
_refine_ls_extinction_method      SHELXL
_refine_ls_extinction_coef        0.041(4)
_refine_ls_extinction_expression
 'Fc^*^=kFc[1+0.001xFc^2^\l^3^/sin(2\q)]^-1/4^'
_refine_ls_number_reflns          1536
_refine_ls_number_parameters      131
_refine_ls_number_restraints      0
_refine_ls_R_factor_all           0.0345
_refine_ls_R_factor_gt            0.0333
_refine_ls_wR_factor_ref          0.0962
_refine_ls_wR_factor_gt           0.0945
_refine_ls_goodness_of_fit_ref    1.066
_refine_ls_restrained_S_all       1.066
_refine_ls_shift/su_max           0.001
_refine_ls_shift/su_mean          0.000
 
loop_
 _atom_site_label
 _atom_site_type_symbol
 _atom_site_fract_x
 _atom_site_fract_y
 _atom_site_fract_z
 _atom_site_U_iso_or_equiv
 _atom_site_adp_type
 _atom_site_occupancy
 _atom_site_symmetry_multiplicity
 _atom_site_calc_flag
 _atom_site_refinement_flags
 _atom_site_disorder_assembly
 _atom_site_disorder_group
C6 C 0.25776(15) -0.10931(12) 1.00670(9) 0.0157(3) Uani 1 1 d . . .
O1 O 0.13433(11) 0.01910(8) 0.85273(6) 0.0166(2) Uani 1 1 d . . .
C4 C 0.23484(15) 0.14956(12) 1.00190(8) 0.0152(3) Uani 1 1 d . . .
O3 O 0.19305(12) 0.27424(8) 0.95180(6) 0.0207(2) Uani 1 1 d . . .
H3 H 0.1257 0.2584 0.8971 0.031 Uiso 1 1 calc R . .
C9 C 0.09699(16) -0.10542(12) 0.79918(8) 0.0170(3) Uani 1 1 d . . .
O2 O 0.02073(12) -0.09443(9) 0.71164(6) 0.0226(2) Uani 1 1 d . . .
C5 C 0.21030(15) 0.01724(12) 0.95441(8) 0.0145(3) Uani 1 1 d . . .
C8 C 0.15190(16) -0.23699(12) 0.85165(9) 0.0179(3) Uani 1 1 d . . .
H8 H 0.1345 -0.3219 0.8156 0.022 Uiso 1 1 calc R . .
C2 C 0.35428(16) 0.02972(13) 1.15770(8) 0.0183(3) Uani 1 1 d . . .
H2 H 0.4031 0.0335 1.2265 0.022 Uiso 1 1 calc R . .
C3 C 0.30659(15) 0.15662(12) 1.10514(8) 0.0160(3) Uani 1 1 d . . .
C1 C 0.33081(16) -0.10073(12) 1.11029(9) 0.0185(3) Uani 1 1 d . . .
H1 H 0.3636 -0.1835 1.1472 0.022 Uiso 1 1 calc R . .
C7 C 0.22743(15) -0.24177(12) 0.95072(8) 0.0173(3) Uani 1 1 d . . .
C10 C 0.32863(16) 0.29864(12) 1.15752(8) 0.0191(3) Uani 1 1 d . . .
H10A H 0.4394 0.3467 1.1401 0.029 Uiso 1 1 calc R . .
H10B H 0.3447 0.2848 1.2295 0.029 Uiso 1 1 calc R . .
H10C H 0.2159 0.3552 1.1364 0.029 Uiso 1 1 calc R . .
C11 C 0.27846(18) -0.38002(12) 1.00371(9) 0.0226(3) Uani 1 1 d . . .
H11A H 0.2522 -0.4569 0.9562 0.034 Uiso 1 1 calc R . .
H11B H 0.2033 -0.3918 1.0573 0.034 Uiso 1 1 calc R . .
H11C H 0.4127 -0.3801 1.0316 0.034 Uiso 1 1 calc R . .
 
loop_
 _atom_site_aniso_label
 _atom_site_aniso_U_11
 _atom_site_aniso_U_22
 _atom_site_aniso_U_33
 _atom_site_aniso_U_23
 _atom_site_aniso_U_13
 _atom_site_aniso_U_12
C6 0.0131(5) 0.0159(6) 0.0186(6) 0.0006(4) 0.0041(4) 0.0008(4)
O1 0.0209(4) 0.0144(4) 0.0134(4) -0.0007(3) -0.0006(3) -0.0014(3)
C4 0.0136(5) 0.0139(6) 0.0181(6) 0.0014(4) 0.0019(4) -0.0001(4)
O3 0.0293(5) 0.0130(4) 0.0170(4) 0.0015(3) -0.0056(3) -0.0005(3)
C9 0.0170(6) 0.0178(6) 0.0166(6) -0.0040(4) 0.0042(4) -0.0028(4)
O2 0.0295(5) 0.0215(5) 0.0155(4) -0.0026(3) -0.0009(3) -0.0027(3)
C5 0.0123(5) 0.0183(6) 0.0129(6) 0.0004(4) 0.0018(4) -0.0001(4)
C8 0.0177(6) 0.0152(6) 0.0217(6) -0.0040(4) 0.0052(4) -0.0013(4)
C2 0.0182(6) 0.0220(6) 0.0137(5) 0.0009(4) -0.0002(4) 0.0016(4)
C3 0.0130(5) 0.0178(6) 0.0173(6) -0.0017(4) 0.0023(4) -0.0002(4)
C1 0.0197(6) 0.0172(6) 0.0184(6) 0.0041(4) 0.0018(4) 0.0031(4)
C7 0.0138(5) 0.0165(6) 0.0225(6) -0.0002(4) 0.0062(4) 0.0006(4)
C10 0.0201(6) 0.0187(6) 0.0177(6) -0.0027(4) 0.0001(4) -0.0002(4)
C11 0.0275(6) 0.0148(6) 0.0257(6) 0.0002(5) 0.0045(5) 0.0026(5)
 
_geom_special_details
;
 All esds (except the esd in the dihedral angle between two l.s. planes)
 are estimated using the full covariance matrix.  The cell esds are taken
 into account individually in the estimation of esds in distances, angles
 and torsion angles; correlations between esds in cell parameters are only
 used when they are defined by crystal symmetry.  An approximate (isotropic)
 treatment of cell esds is used for estimating esds involving l.s. planes.
;
 
loop_
 _geom_bond_atom_site_label_1
 _geom_bond_atom_site_label_2
 _geom_bond_distance
 _geom_bond_site_symmetry_2
 _geom_bond_publ_flag
C6 C5 1.3932(16) . ?
C6 C1 1.4017(16) . ?
C6 C7 1.4506(16) . ?
O1 C9 1.3752(14) . ?
O1 C5 1.3804(13) . ?
C4 O3 1.3586(14) . ?
C4 C5 1.3943(16) . ?
C4 C3 1.3946(16) . ?
O3 H3 0.8200 . ?
C9 O2 1.2129(14) . ?
C9 C8 1.4439(16) . ?
C8 C7 1.3482(16) . ?
C8 H8 0.9300 . ?
C2 C1 1.3777(17) . ?
C2 C3 1.3979(16) . ?
C2 H2 0.9300 . ?
C3 C10 1.5035(16) . ?
C1 H1 0.9300 . ?
C7 C11 1.4961(16) . ?
C10 H10A 0.9600 . ?
C10 H10B 0.9600 . ?
C10 H10C 0.9600 . ?
C11 H11A 0.9600 . ?
C11 H11B 0.9600 . ?
C11 H11C 0.9600 . ?
 
loop_
 _geom_angle_atom_site_label_1
 _geom_angle_atom_site_label_2
 _geom_angle_atom_site_label_3
 _geom_angle
 _geom_angle_site_symmetry_1
 _geom_angle_site_symmetry_3
 _geom_angle_publ_flag
C5 C6 C1 117.94(10) . . ?
C5 C6 C7 117.98(10) . . ?
C1 C6 C7 124.08(10) . . ?
C9 O1 C5 120.97(9) . . ?
O3 C4 C5 122.87(10) . . ?
O3 C4 C3 117.61(10) . . ?
C5 C4 C3 119.51(10) . . ?
C4 O3 H3 109.5 . . ?
O2 C9 O1 116.70(10) . . ?
O2 C9 C8 125.86(10) . . ?
O1 C9 C8 117.44(10) . . ?
O1 C5 C6 122.03(10) . . ?
O1 C5 C4 115.98(9) . . ?
C6 C5 C4 121.99(10) . . ?
C7 C8 C9 122.69(10) . . ?
C7 C8 H8 118.7 . . ?
C9 C8 H8 118.7 . . ?
C1 C2 C3 121.72(10) . . ?
C1 C2 H2 119.1 . . ?
C3 C2 H2 119.1 . . ?
C4 C3 C2 118.55(10) . . ?
C4 C3 C10 119.85(10) . . ?
C2 C3 C10 121.60(10) . . ?
C2 C1 C6 120.29(10) . . ?
C2 C1 H1 119.9 . . ?
C6 C1 H1 119.9 . . ?
C8 C7 C6 118.78(10) . . ?
C8 C7 C11 121.49(10) . . ?
C6 C7 C11 119.72(10) . . ?
C3 C10 H10A 109.5 . . ?
C3 C10 H10B 109.5 . . ?
H10A C10 H10B 109.5 . . ?
C3 C10 H10C 109.5 . . ?
H10A C10 H10C 109.5 . . ?
H10B C10 H10C 109.5 . . ?
C7 C11 H11A 109.5 . . ?
C7 C11 H11B 109.5 . . ?
H11A C11 H11B 109.5 . . ?
C7 C11 H11C 109.5 . . ?
H11A C11 H11C 109.5 . . ?
H11B C11 H11C 109.5 . . ?
 
loop_
 _geom_torsion_atom_site_label_1
 _geom_torsion_atom_site_label_2
 _geom_torsion_atom_site_label_3
 _geom_torsion_atom_site_label_4
 _geom_torsion
 _geom_torsion_site_symmetry_1
 _geom_torsion_site_symmetry_2
 _geom_torsion_site_symmetry_3
 _geom_torsion_site_symmetry_4
 _geom_torsion_publ_flag
C5 O1 C9 O2 176.14(9) . . . . ?
C5 O1 C9 C8 -3.96(15) . . . . ?
C9 O1 C5 C6 1.90(16) . . . . ?
C9 O1 C5 C4 -177.46(9) . . . . ?
C1 C6 C5 O1 -178.85(9) . . . . ?
C7 C6 C5 O1 0.79(16) . . . . ?
C1 C6 C5 C4 0.47(16) . . . . ?
C7 C6 C5 C4 -179.89(9) . . . . ?
O3 C4 C5 O1 -2.00(16) . . . . ?
C3 C4 C5 O1 178.50(9) . . . . ?
O3 C4 C5 C6 178.64(9) . . . . ?
C3 C4 C5 C6 -0.86(17) . . . . ?
O2 C9 C8 C7 -176.53(10) . . . . ?
O1 C9 C8 C7 3.58(16) . . . . ?
O3 C4 C3 C2 -178.70(9) . . . . ?
C5 C4 C3 C2 0.83(16) . . . . ?
O3 C4 C3 C10 2.07(15) . . . . ?
C5 C4 C3 C10 -178.41(9) . . . . ?
C1 C2 C3 C4 -0.47(17) . . . . ?
C1 C2 C3 C10 178.75(10) . . . . ?
C3 C2 C1 C6 0.10(17) . . . . ?
C5 C6 C1 C2 -0.09(17) . . . . ?
C7 C6 C1 C2 -179.70(10) . . . . ?
C9 C8 C7 C6 -1.00(17) . . . . ?
C9 C8 C7 C11 178.46(10) . . . . ?
C5 C6 C7 C8 -1.18(16) . . . . ?
C1 C6 C7 C8 178.43(10) . . . . ?
C5 C6 C7 C11 179.34(10) . . . . ?
C1 C6 C7 C11 -1.05(16) . . . . ?
 
_diffrn_measured_fraction_theta_max    0.999
_diffrn_reflns_theta_full              25.00
_diffrn_measured_fraction_theta_full   0.999
_refine_diff_density_max    0.188
_refine_diff_density_min   -0.224
_refine_diff_density_rms    0.045
